# Supplementary material for: Nicotinamide Mononucleotide (NMN) Works in Type 2 Diabetes through Unexpected Effects in Adipose Tissue, Not by Mitochondrial Biogenesis
Source: MDPI journal article supplement (doi:10.3390/ijms25052594), 2024-02-23

**RIBOSOME**

Large subunit (*Haloarcula marismortui*)

Small subunit (*Thermus aquaticus*)

**Ribosomal RNAs**

| Bacteria / Archaea | 23S | SS   | 16S |
|--------------------|-----|------|-----|
| Eukaryotes         | 25S | 5.8S | 18S |

**Ribosomal proteins**

EF-Tu

| S10  | L3  | L4  | L23   | L2  | S19  | L22  | S3  | L16 | L29  |
|------|-----|-----|-------|-----|------|------|-----|-----|------|
| S20e | L3e | L4e | L23Ae | L8e | S15e | L17e | S3e |     | L35e |

SecY

| S17  | L14  | L24  |     | L5   | S14  | S8    | L6  |      | L18  | S5  | L30 | L15 |       |
|------|------|------|-----|------|------|-------|-----|------|------|-----|-----|-----|-------|
| S11e | L23e | L26e | S4e | L11e | S29e | S15Ae | L9e | L32e | L19e | L5e | S2e | L7e | L27Ae |

IF1

| L36  | S13  | S11  | S4   | RpoA |  | L17  | L13   | S9   |
|------|------|------|------|------|--|------|-------|------|
| L34e | L14e | S18e | S14e | S9e  |  | L18e | L13Ae | S16e |

EF-Tu,G

| S7  | S12  |      | L7A  | RpoC,B |  | L7/L12  | L12 | L10   | L1   | L11 |
|-----|------|------|------|--------|--|---------|-----|-------|------|-----|
| S5e | S23e | L30e | L7Ae |        |  | LP1,LP2 | LP0 | L10Ae | L12e |     |

EF-Ts

| S2   | IF2         | IF3 | RF1 |     |     |     |    |     |    |
|------|-------------|-----|-----|-----|-----|-----|----|-----|----|
| S Ae | S15<br>S13e | L35 | L20 | L34 | L31 | L32 | L9 | S18 | S6 |

FtsY,FH

| L28  | L33  | L21  | L27  |      | S1   | S20   | S21  | L25   |      |      |      |      |
|------|------|------|------|------|------|-------|------|-------|------|------|------|------|
| L10e | L13e | L15e | L21e | L24e | L31e | L35Ae | L37e | L37Ae | L39e | L40e | L41e | L44e |

S3Ae

| S6e | S8e   | S17e | S19e | S24e | S25e | S26e | S27e | S27Ae | S28e | S30e | LX |
|-----|-------|------|------|------|------|------|------|-------|------|------|----|
| L6e | L18Ae | L22e | L27e | L28e | L29e | L36e | L38e |       |      |      |    |

S7e

| S10e | S12e | S21e |
|------|------|------|
|      |      |      |

[illegible]

**Figure S4.** NMN treatment effects on the KEGG ribosome biogenesis pathway in mouse liver. The colour of the boxes represents the log2 fold change of the protein abundances, represented for HFD+NMN group versus HFD group comparison. Red: up-regulated; green: down-regulated; grey: no significant expression change.

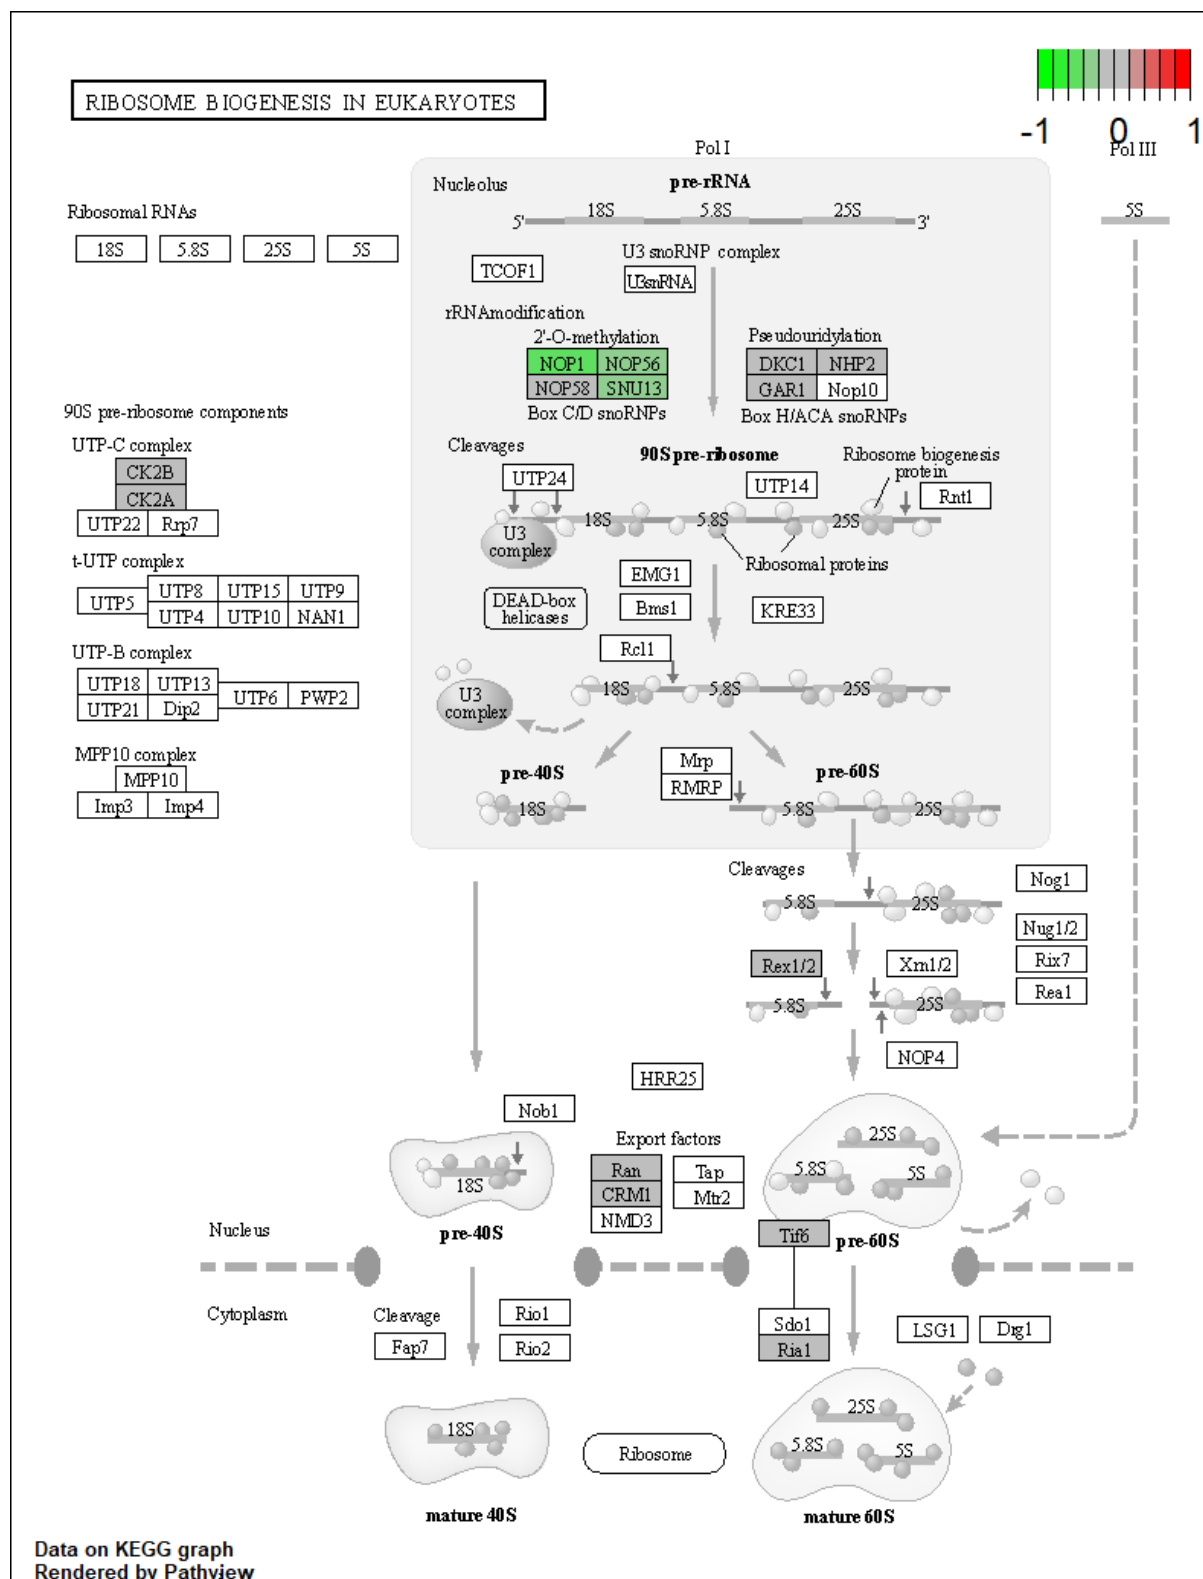

[illegible]

Data on KEGG graph  
Rendered by Pathview

[illegible]

Data on KEGG graph  
Rendered by Pathview









**Figure S10.** NMN treatment effects on the KEGG valine, leucine and isoleucine degradation pathway in mouse muscle. The colour of the boxes represents the log2 fold change of the protein abundances, represented for HFD+NMN group versus HFD group comparison. Red: up-regulated; green: down-regulated; grey: no significant expression change.

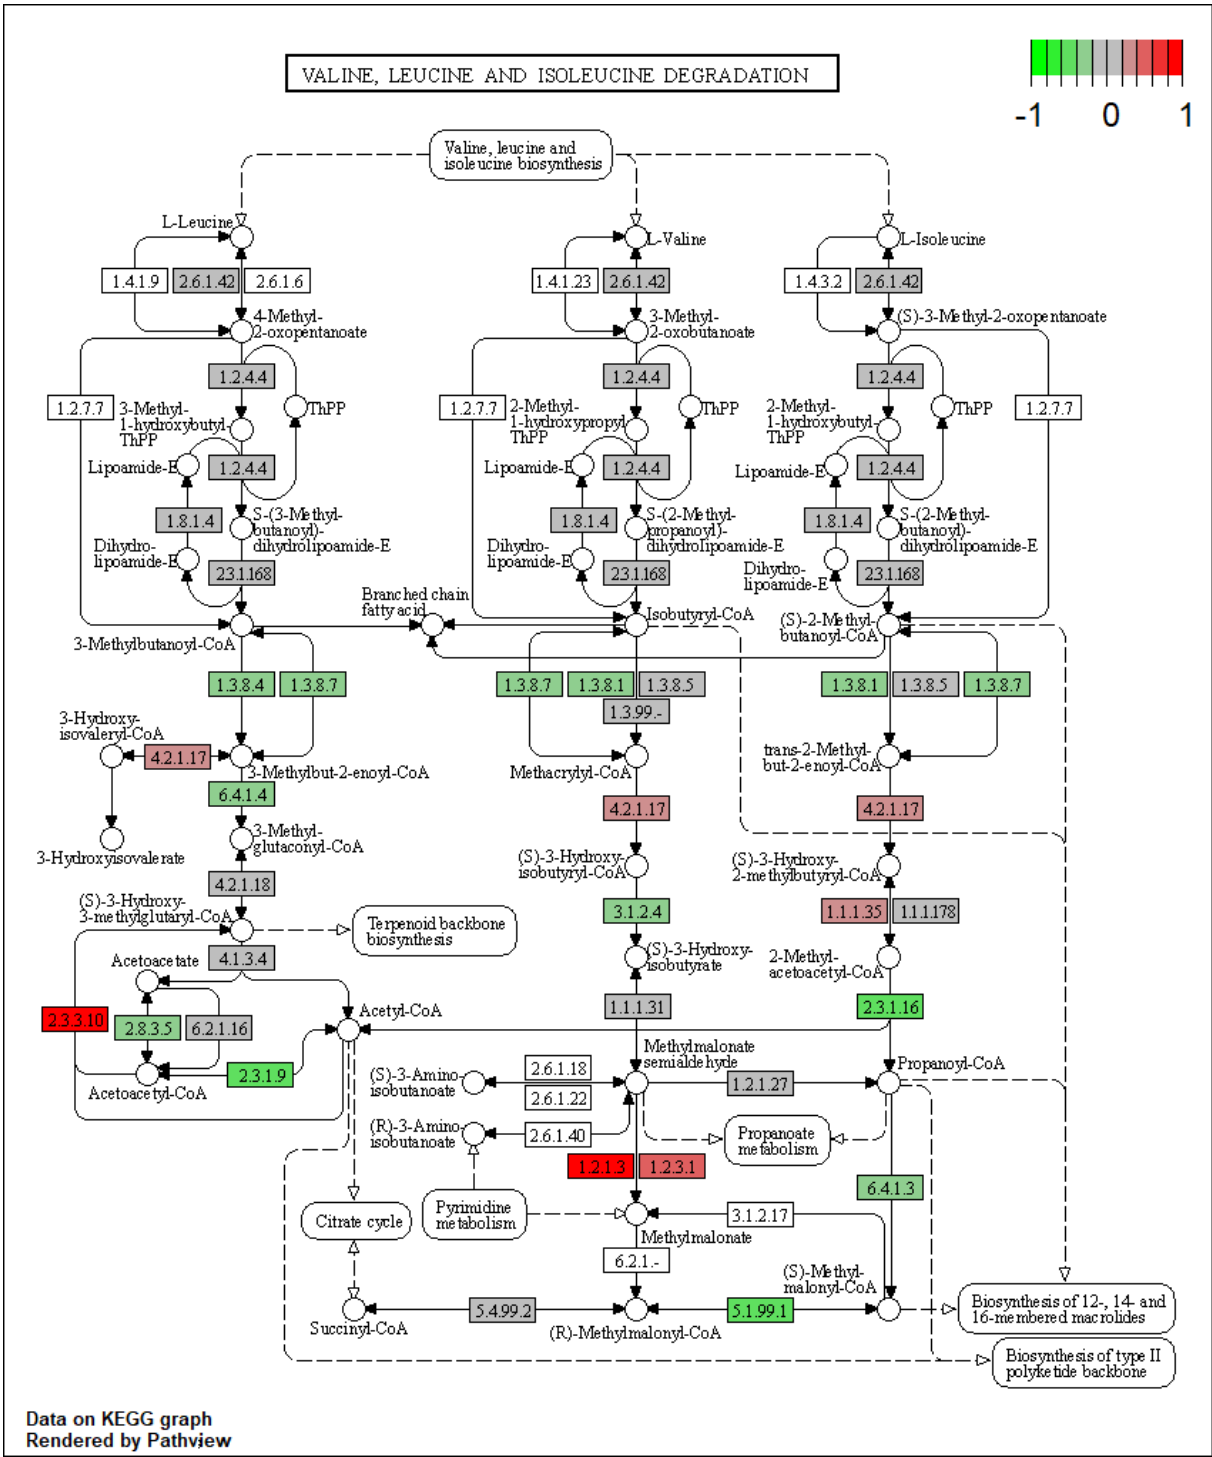

**Figure S11.** NMN treatment effects on the KEGG spliceosome pathway in mouse adipose tissue. The colour of the boxes represents the log2 fold change of the protein abundances, represented for HFD+NMN group versus HFD group comparison. Red: up-regulated; green: down-regulated; grey: no significant expression change.

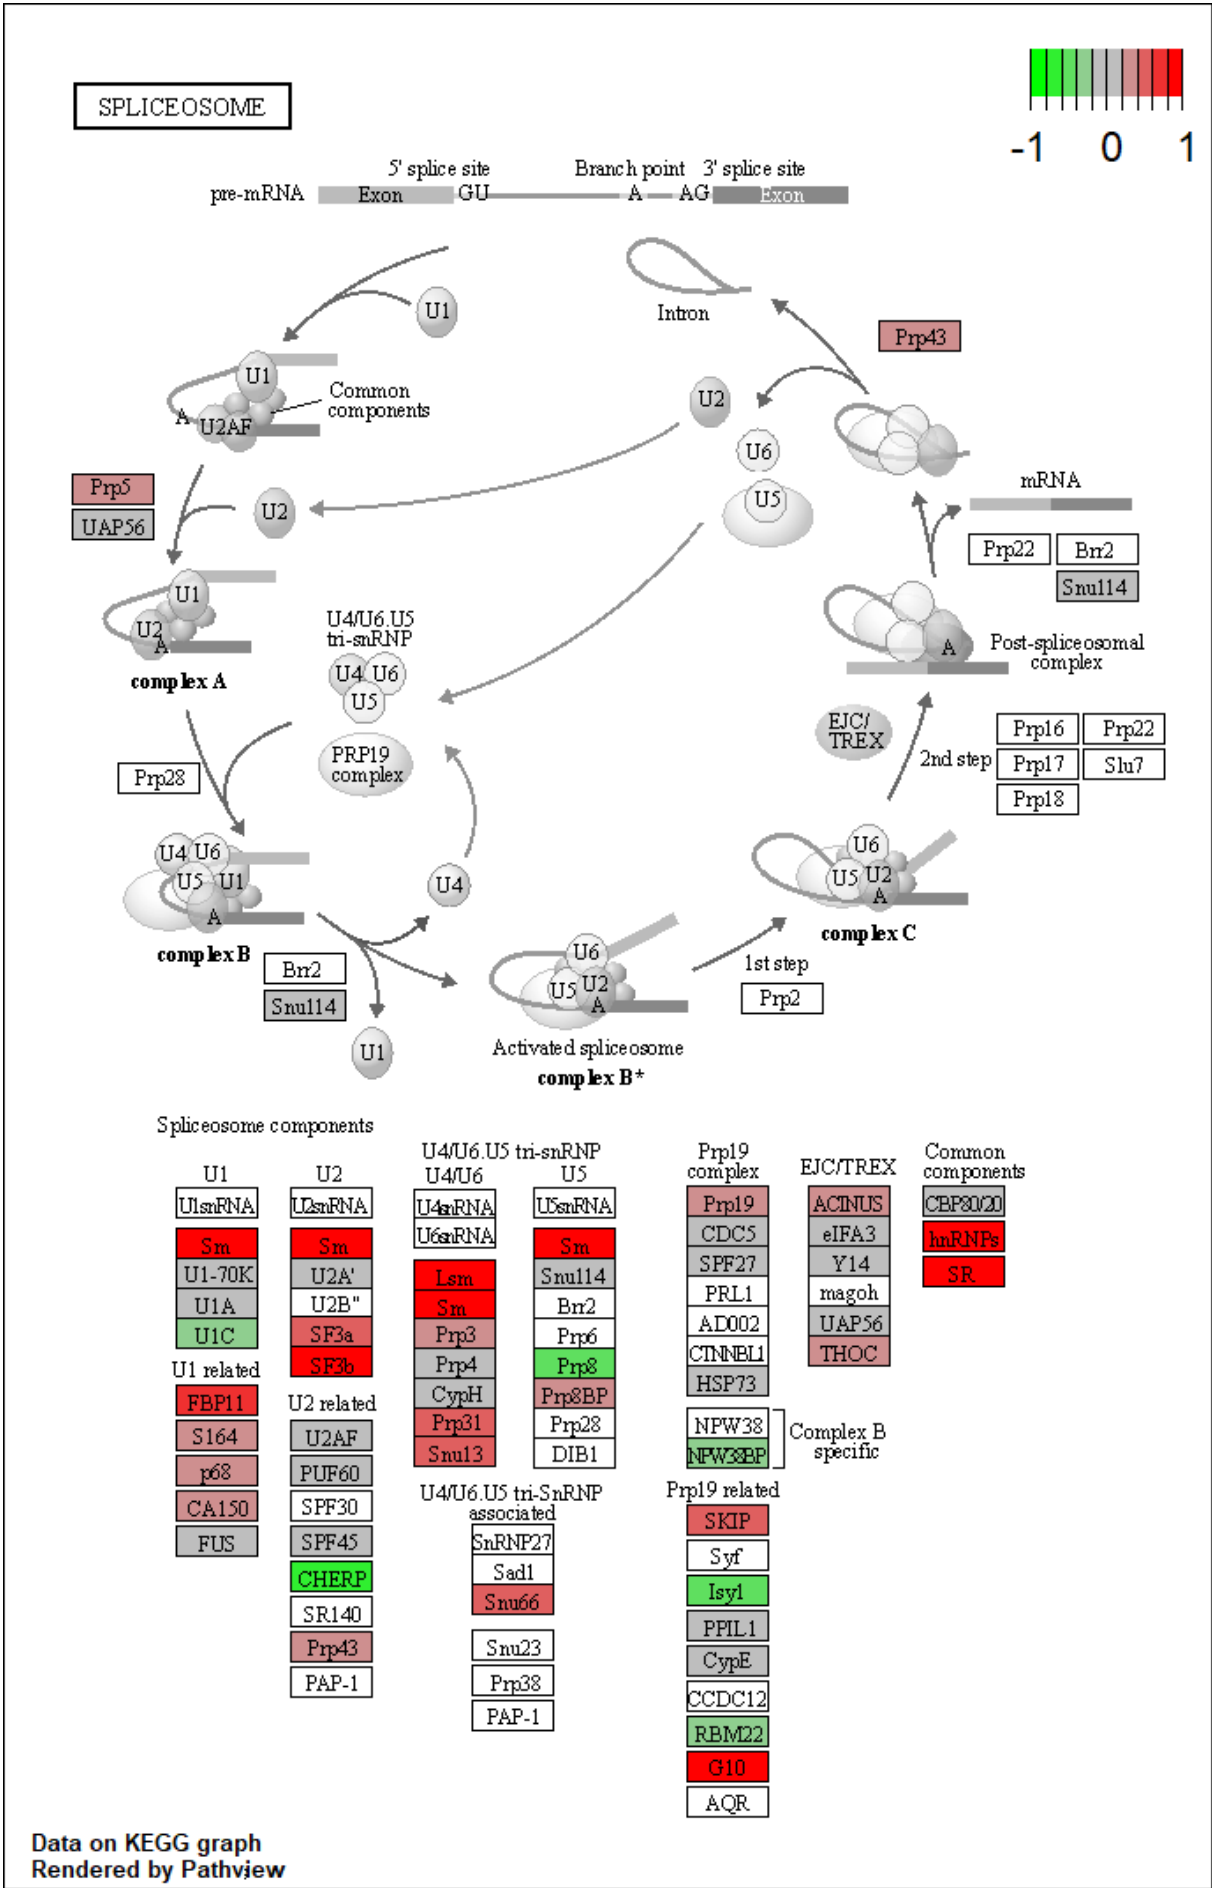

**Figure S12.** NMN treatment effects on the KEGG regulation of actin cytoskeleton pathway in mouse adipose tissue. The colour of the boxes represents the log2 fold change of the protein abundances, represented for HFD+NMN group versus HFD group comparison. Red: up-regulated; green: down-regulated; grey: no significant expression change.

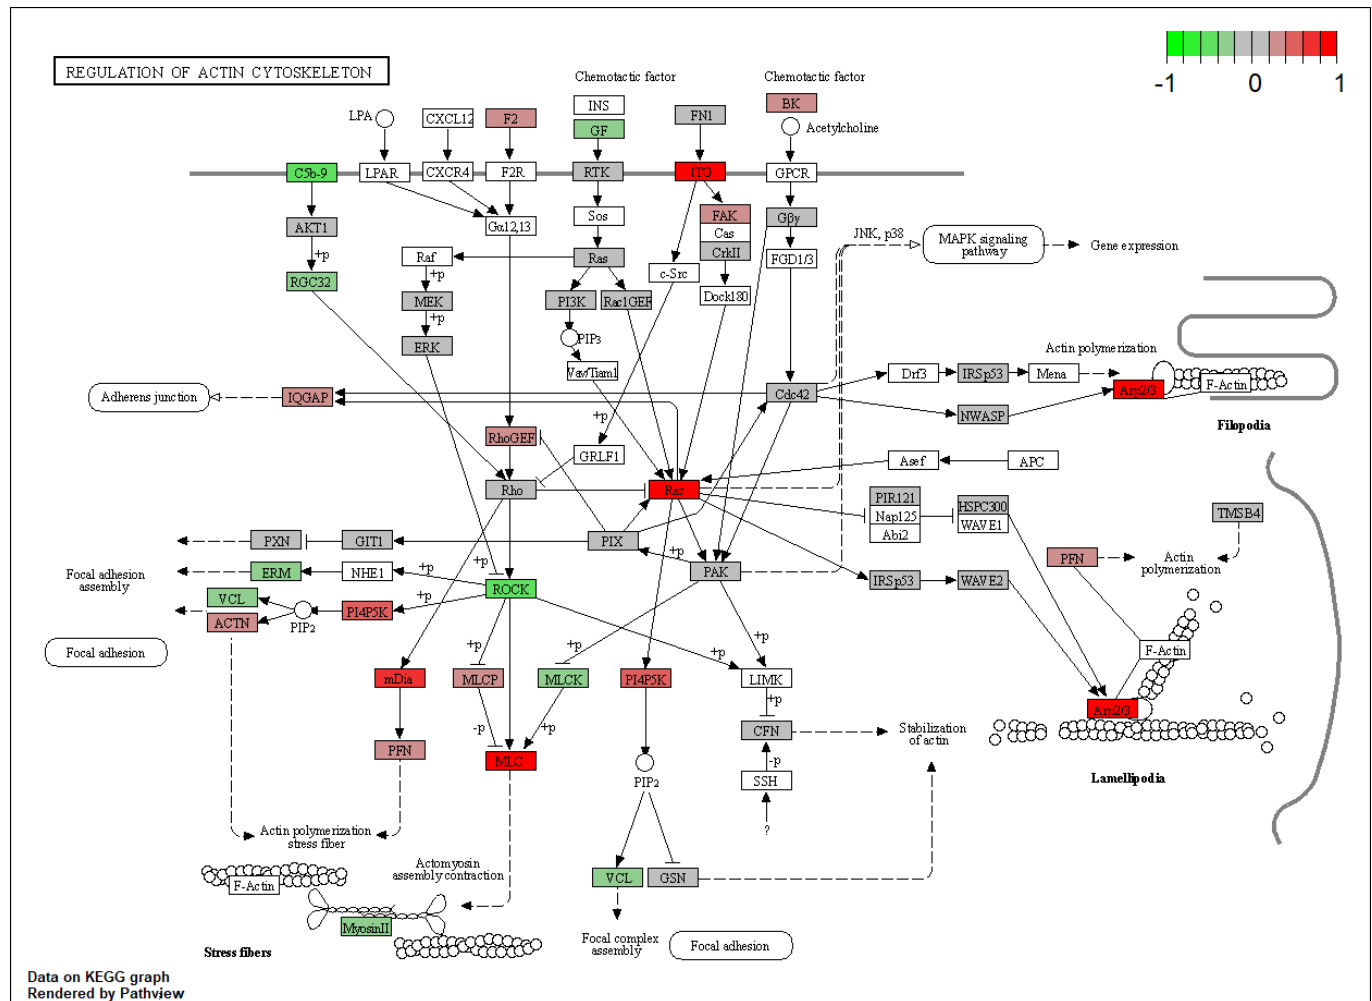

**Figure S13.** NMN treatment effects on the KEGG proteasome pathway in mouse adipose tissue. The colour of the boxes represents the log2 fold change of the protein abundances, represented for HFD+NMN group versus HFD group comparison. Red: up-regulated; green: down-regulated; grey: no significant expression change.

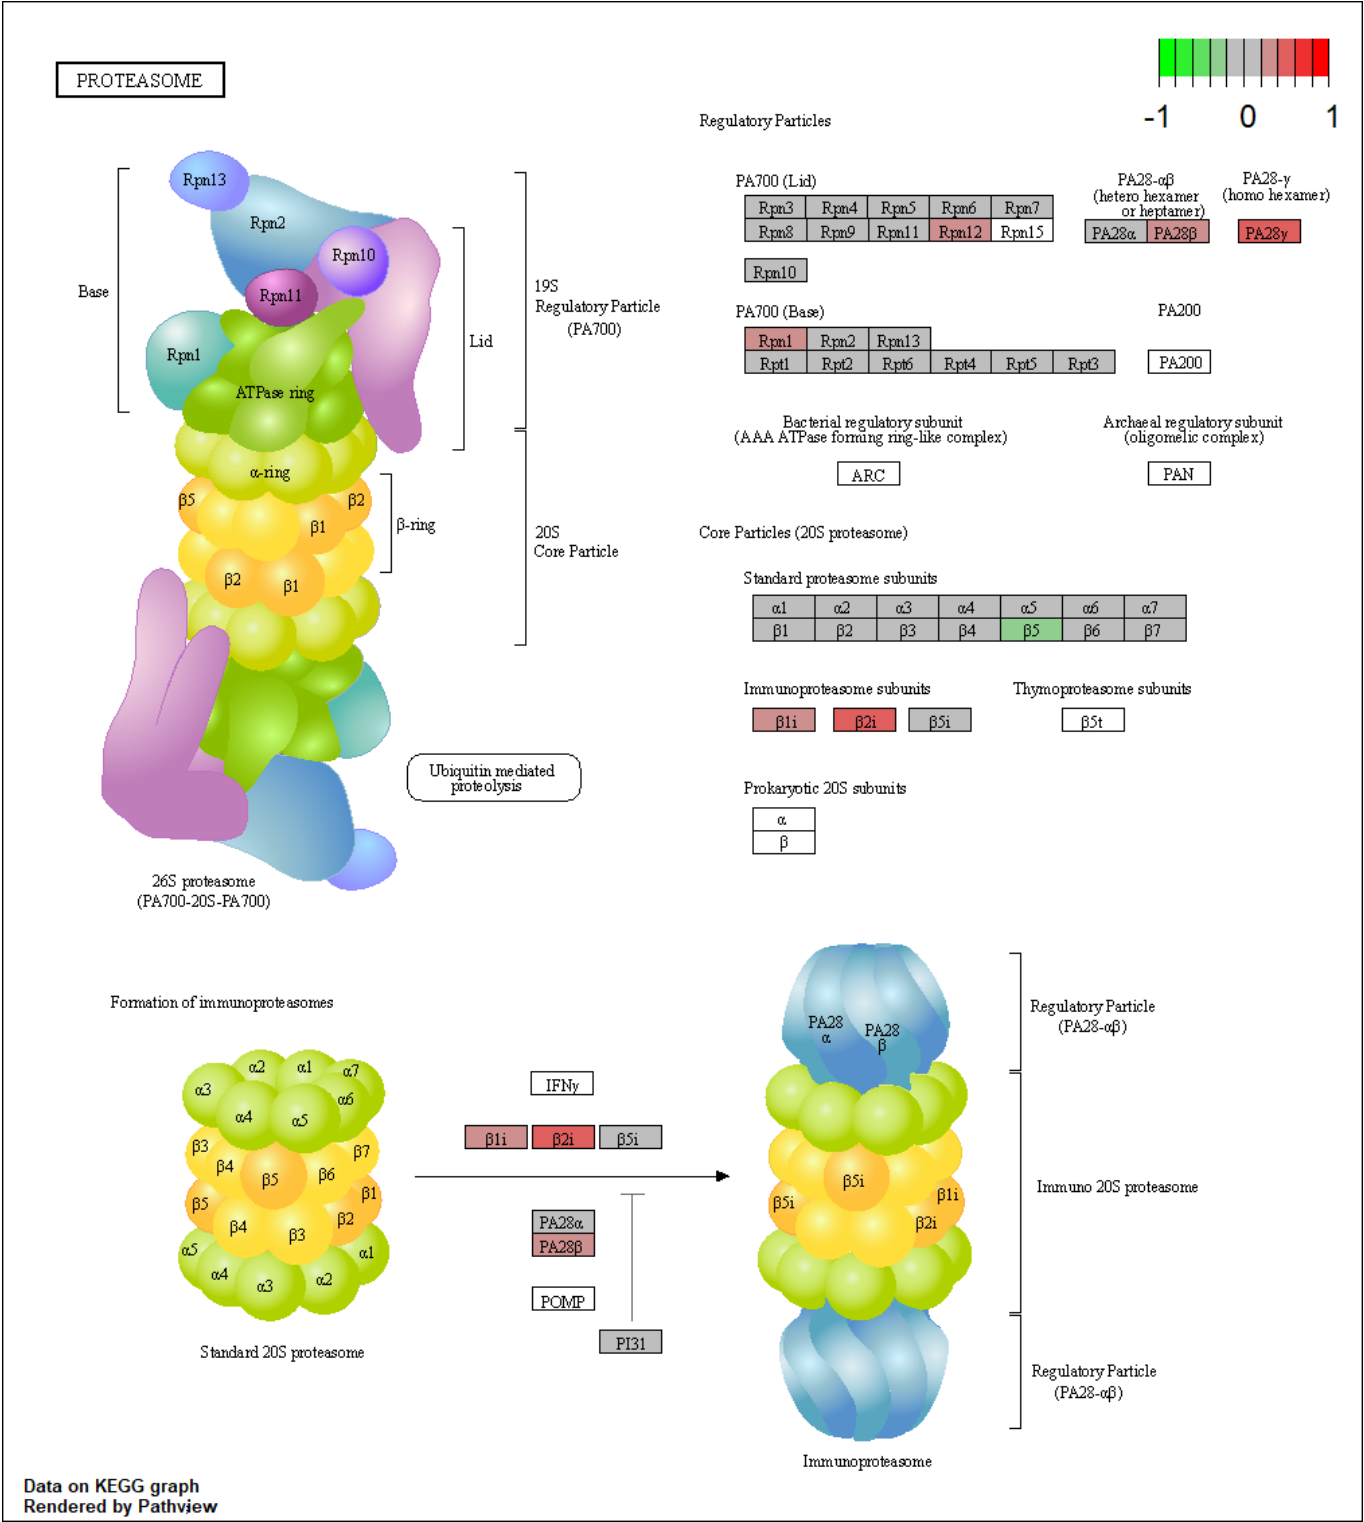

**Figure S14.** NMN treatment effects on the KEGG mTOR signaling pathway in mouse adipose tissue. The colour of the boxes represents the log2 fold change of the protein abundances, represented for HFD+NMN group versus HFD group comparison. Red: up-regulated; green: down-regulated; grey: no significant expression change.

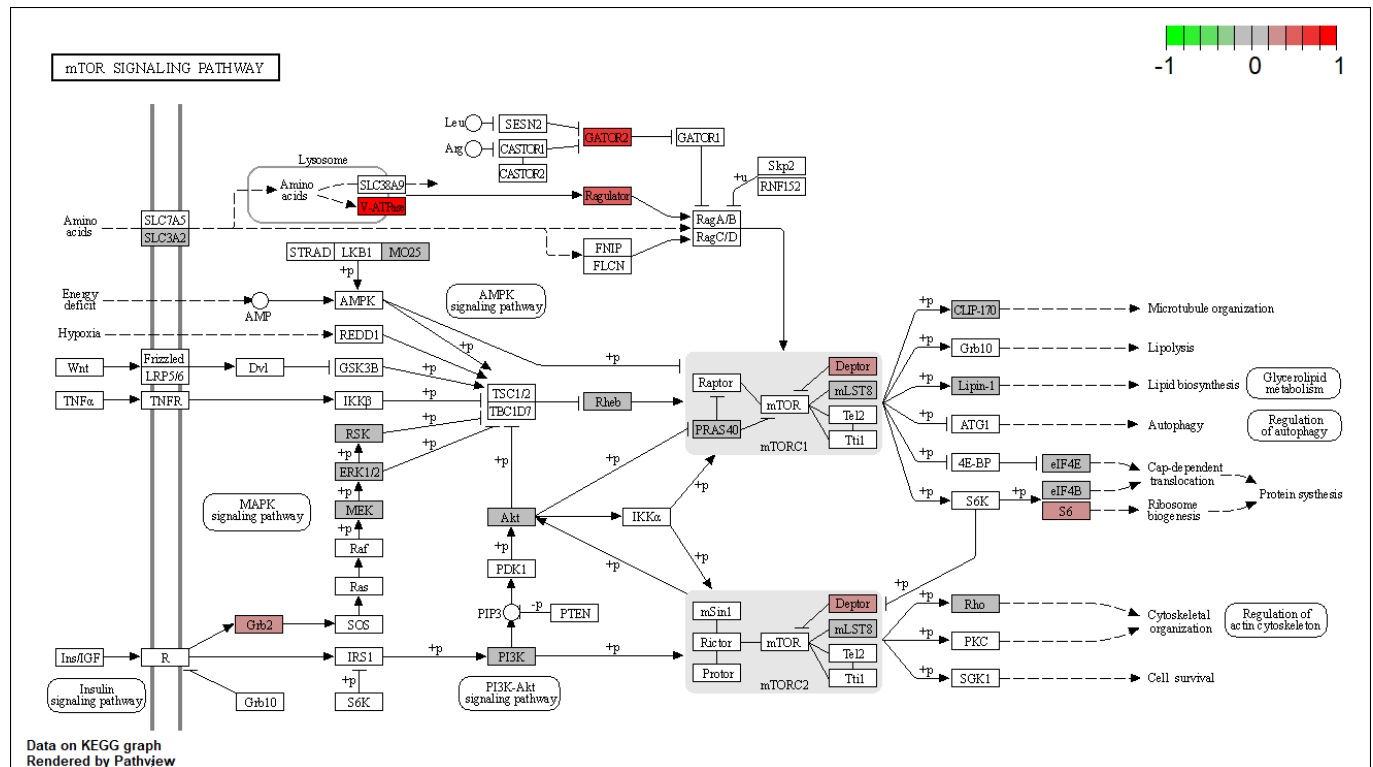

**Figure S15.** NMN treatment effects on the KEGG tight junction's pathway in mouse adipose tissue. The colour of the boxes represents the log2 fold change of the protein abundances, represented for HFD+NMN group versus HFD group comparison. Red: up-regulated; green: down-regulated; grey: no significant expression change.

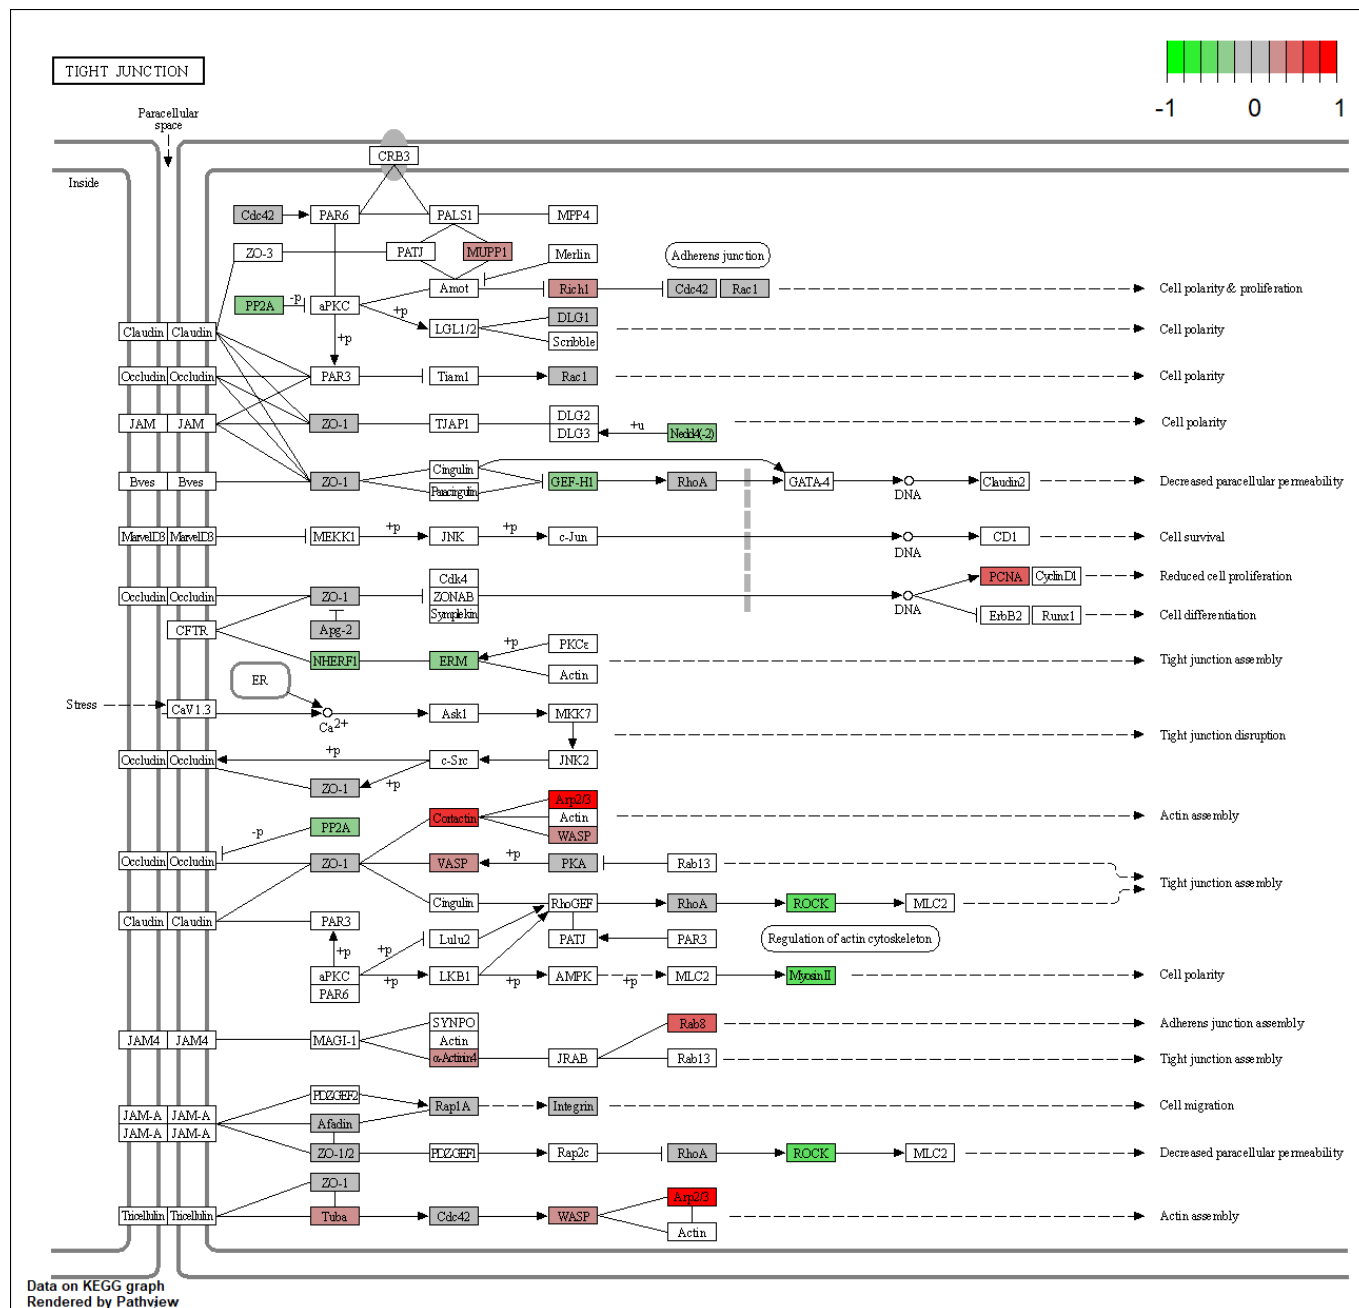



**Figure S17.** NMN treatment effects on the KEGG tight junctions' pathway in mouse brain. The colour of the boxes represents the log2 fold change of the protein abundances, represented for HFD+NMN group versus HFD group comparison. Red: up-regulated; green: down-regulated; grey: no significant expression change.

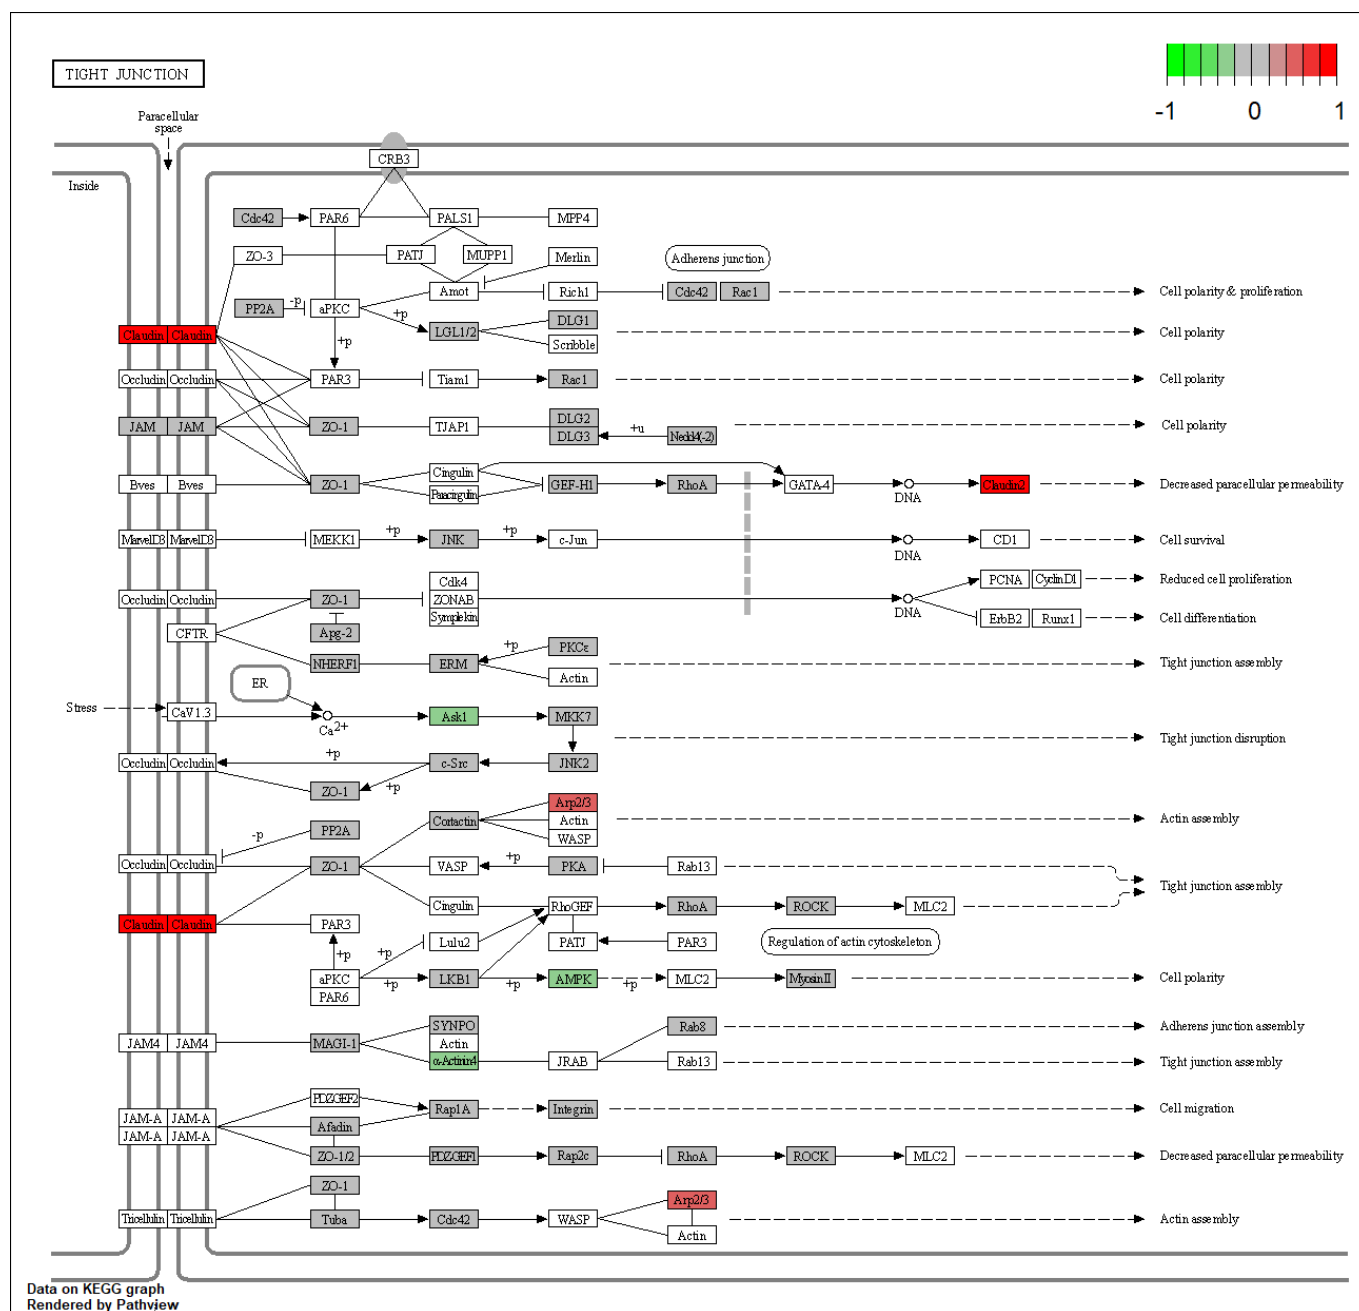



**Figure S18.** NMN treatment effects on the KEGG protein processing in endoplasmic reticulum pathway in mouse brain. The colour of the boxes represents the log2 fold change of the protein abundances, represented for HFD+NMN group versus HFD group comparison. Red: up-regulated; green: down-regulated; grey: no significant expression change.

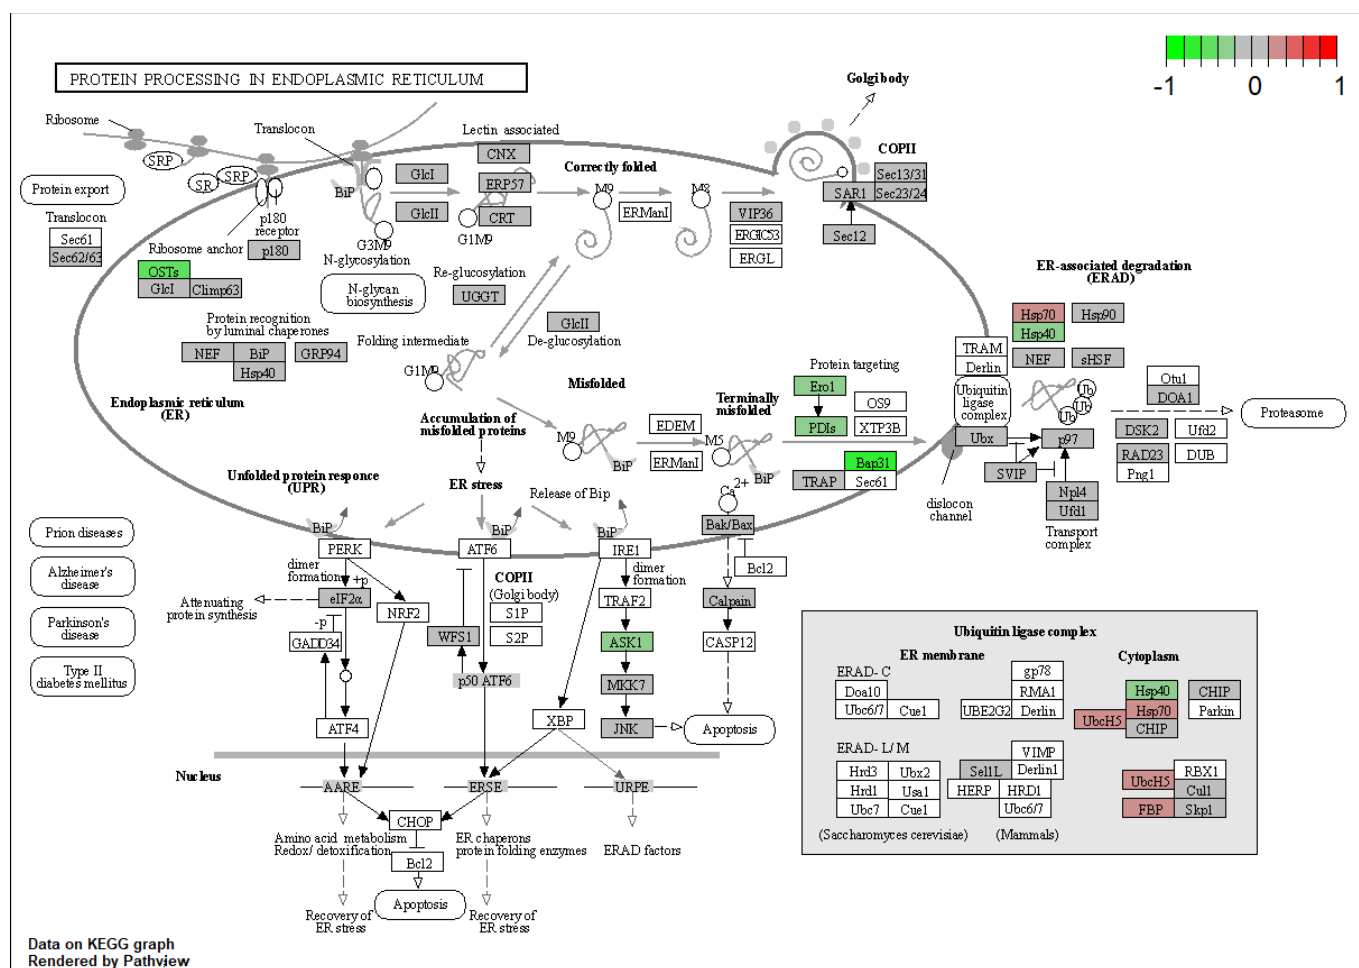

**Figure S19.** NMN treatment effects on the KEGG ribosome pathway in HepG2 cells. The colour of the boxes represents the log2 fold change of the protein abundances, represented simultaneously for HN and HH comparisons, H100N versus H0N left side, H100H versus H0H right side, in the corresponding box for each protein. Red: up-regulated; green: down-regulated; grey: no significant expression change.

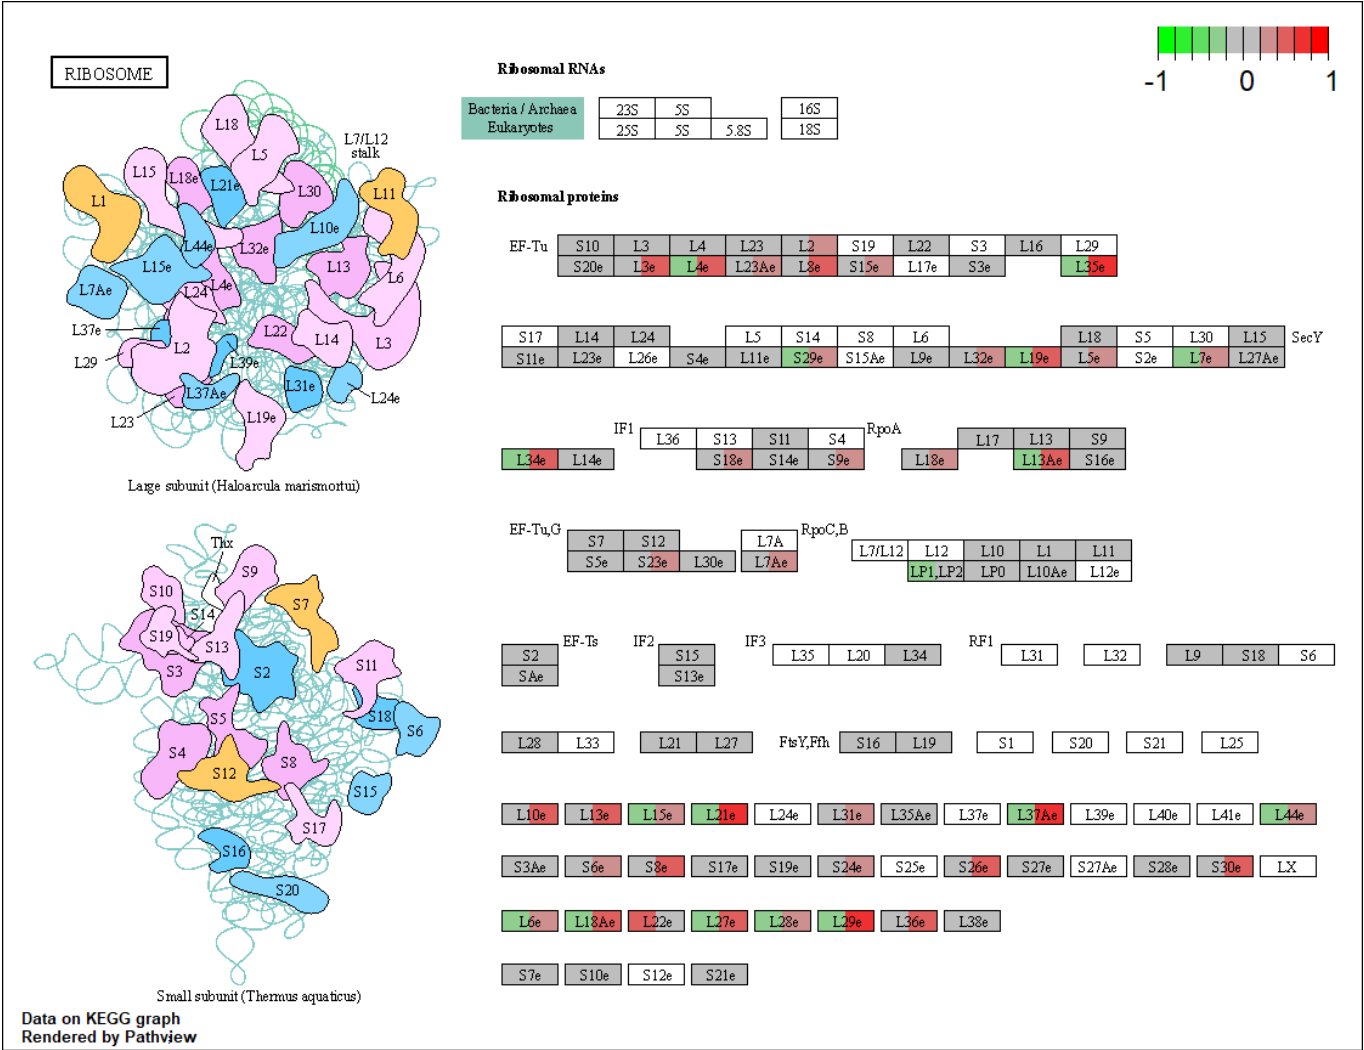

**OXIDATIVE PHOSPHORYLATION**

Complex I: NADH dehydrogenase (Thermus thermophilus). Subunits: ND1, ND2, ND3, ND4, ND5, ND6. FMN, NADH, NAD<sup>+</sup>, H<sup>+</sup>.

Complex II: Succinate dehydrogenase (E. coli). Subunits: SdhA, SdhB, SdhC, SdhD. Succinate, Fumarate, Iron protein, Quinone pool.

Complex III: Cytochrome bc<sub>1</sub> complex (bovine). Subunits: Core 1, Core 2, Cyt b, Cyt c<sub>1</sub>, ISP, Cyt c<sub>2</sub>.

Complex IV: Cytochrome c oxidase (bovine). Subunits: VIa, VIb, VIc, VIIa, VIIb, VIIc. 1/2 O<sub>2</sub>, 2H<sup>+</sup>, H<sub>2</sub>O.

Complex V: ATP synthase (Escherichia coli). Subunits: a, b, c, d, e, f<sub>1</sub>, f<sub>0</sub>, f<sub>1</sub>, f<sub>0</sub>, f<sub>1</sub>, f<sub>0</sub>. Proton channel, ATP synthase.

**NADH dehydrogenase**

|     |        |        |        |        |        |        |
|-----|--------|--------|--------|--------|--------|--------|
| E   | ND1    | ND2    | ND3    | ND4    | ND5    | ND6    |
| E   | Ndufs1 | Ndufs2 | Ndufs3 | Ndufs4 | Ndufs5 | Ndufs6 |
| B/A | NuoA   | NuoB   | NuoC   | NuoD   | NuoE   | NuoF   |
| B/A | NdhC   | NdhK   | NdhJ   | NdhH   | NdhA   | NdhI   |
| E   | Ndufa1 | Ndufa2 | Ndufa3 | Ndufa4 | Ndufa5 | Ndufa6 |
| E   | Ndufb1 | Ndufb2 | Ndufb3 | Ndufb4 | Ndufb5 | Ndufb6 |

**Succinate dehydrogenase / Fumarate reductase**

|     |      |      |      |      |
|-----|------|------|------|------|
| E   | SDHC | SDHD | SDHA | SDHB |
| B/A | SdhC | SdhD | SdhA | SdhB |
|     | Frda | Frdb | Frdc | Frdd |

**Cytochrome c reductase**

|     |      |       |                    |      |      |      |       |
|-----|------|-------|--------------------|------|------|------|-------|
| E   | COR1 | QCR2  | QCR6               | QCR7 | QCR8 | QCR9 | QCR10 |
| B/A | ISP  | Cyt b | Cyt c <sub>1</sub> |      |      |      |       |

**Cytochrome c oxidase**

|     |       |      |      |      |      |       |       |       |       |       |       |       |       |      |       |       |       |
|-----|-------|------|------|------|------|-------|-------|-------|-------|-------|-------|-------|-------|------|-------|-------|-------|
| E   | COX10 | COX3 | COX1 | COX2 | COX4 | COX5A | COX5B | COX6A | COX6B | COX6C | COX7A | COX7B | COX7C | COX8 | COX11 | COX15 | COX17 |
| B/A | CyoE  | CyoD | CyoC | CyoB | CyoA | CoxD  | CoxC  | CoxA  | CoxB  | QoxD  | QoxC  | QoxB  | QoxA  | SoxD | SoxC  | SoxB  | SoxA  |

**Cytochrome c oxidase, cbb3-type**

|   |   |    |    |     |
|---|---|----|----|-----|
| B | I | II | IV | III |
|---|---|----|----|-----|

**Cytochrome bd complex**

|     |      |      |      |
|-----|------|------|------|
| B/A | CydA | CydB | CydX |
|-----|------|------|------|

**Cytochrome c**

|     |
|-----|
| CYC |
|-----|

**F-type ATPase (Bacteria)**

|       |      |       |       |         |
|-------|------|-------|-------|---------|
| alpha | beta | gamma | delta | epsilon |
| a     | b    | c     |       |         |

**F-type ATPase (Eukaryotes)**

|       |      |       |       |         |
|-------|------|-------|-------|---------|
| alpha | beta | gamma | delta | epsilon |
| OSCP  | a    | b     | c     | d       |
| f     | g    | f6/h  | j     | k       |

**V/A-type ATPase (Bacteria, Archaea)**

|   |   |   |   |   |   |     |
|---|---|---|---|---|---|-----|
| A | B | C | D | E | F | G/H |
| I | K |   |   |   |   |     |

**V-type ATPase (Eukaryotes)**

|   |   |   |   |    |   |   |   |
|---|---|---|---|----|---|---|---|
| A | B | C | D | E  | F | G | H |
| a | c | d | e | S1 |   |   |   |

Data on KEGG graph  
Rendered by Pathview

Data on KEGG graph  
Rendered by Pathvew

[illegible]

Data on KEGG graph  
Rendered by Pathview

**Figure S22.** NMN treatment effects on the KEGG DNA replication pathway in HepG2 cells. The colour of the boxes represents the log2 fold change of the protein abundances, represented simultaneously for HN and HH comparisons, H100N versus H0N left side, H100H versus H0H right side, in the corresponding box for each protein. Red: up-regulated; green: down-regulated; grey: no significant expression change.

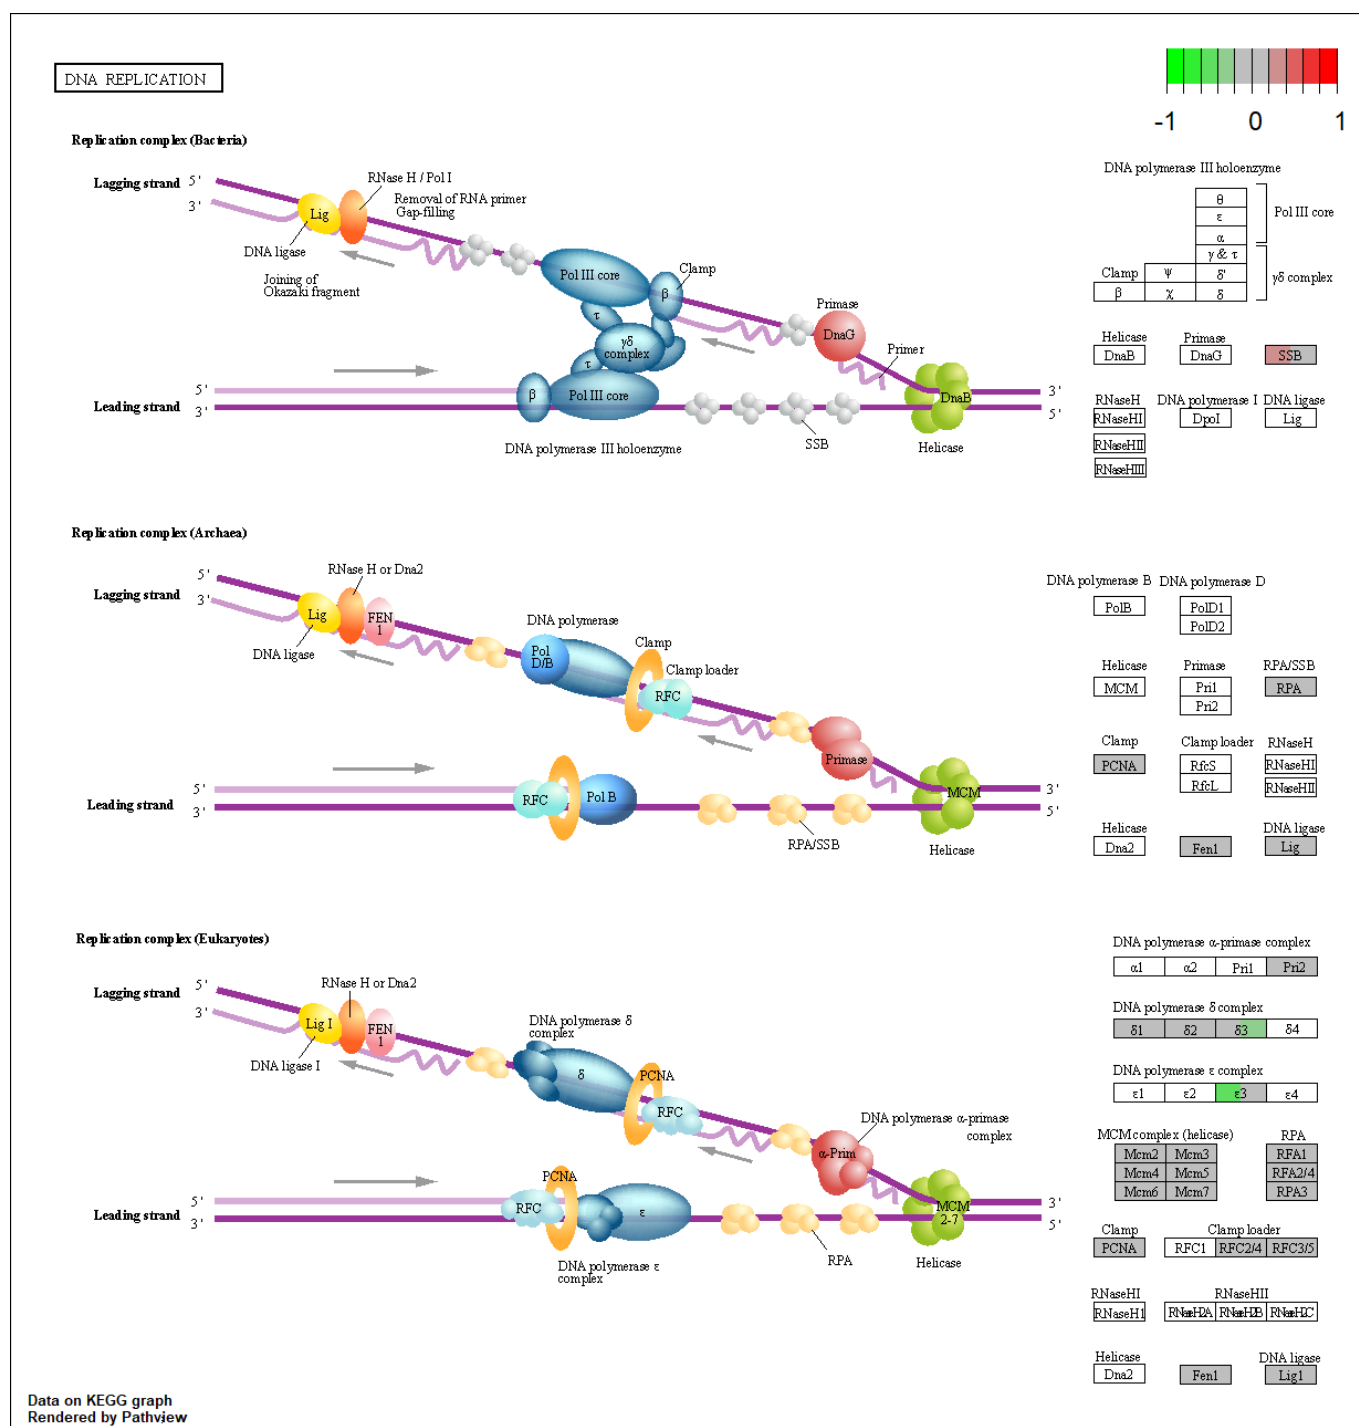









**Figure S26.** NMN treatment effects on the KEGG proteasome pathway in C2C12 derived myotubes. The colour of the boxes represents the log2 fold change of the protein abundances, represented simultaneously for HN and HH comparisons, H100N versus H0N left side, H100H versus H0H right side, in the corresponding box for each protein. Red: up-regulated; green: down-regulated; grey: no significant expression change.

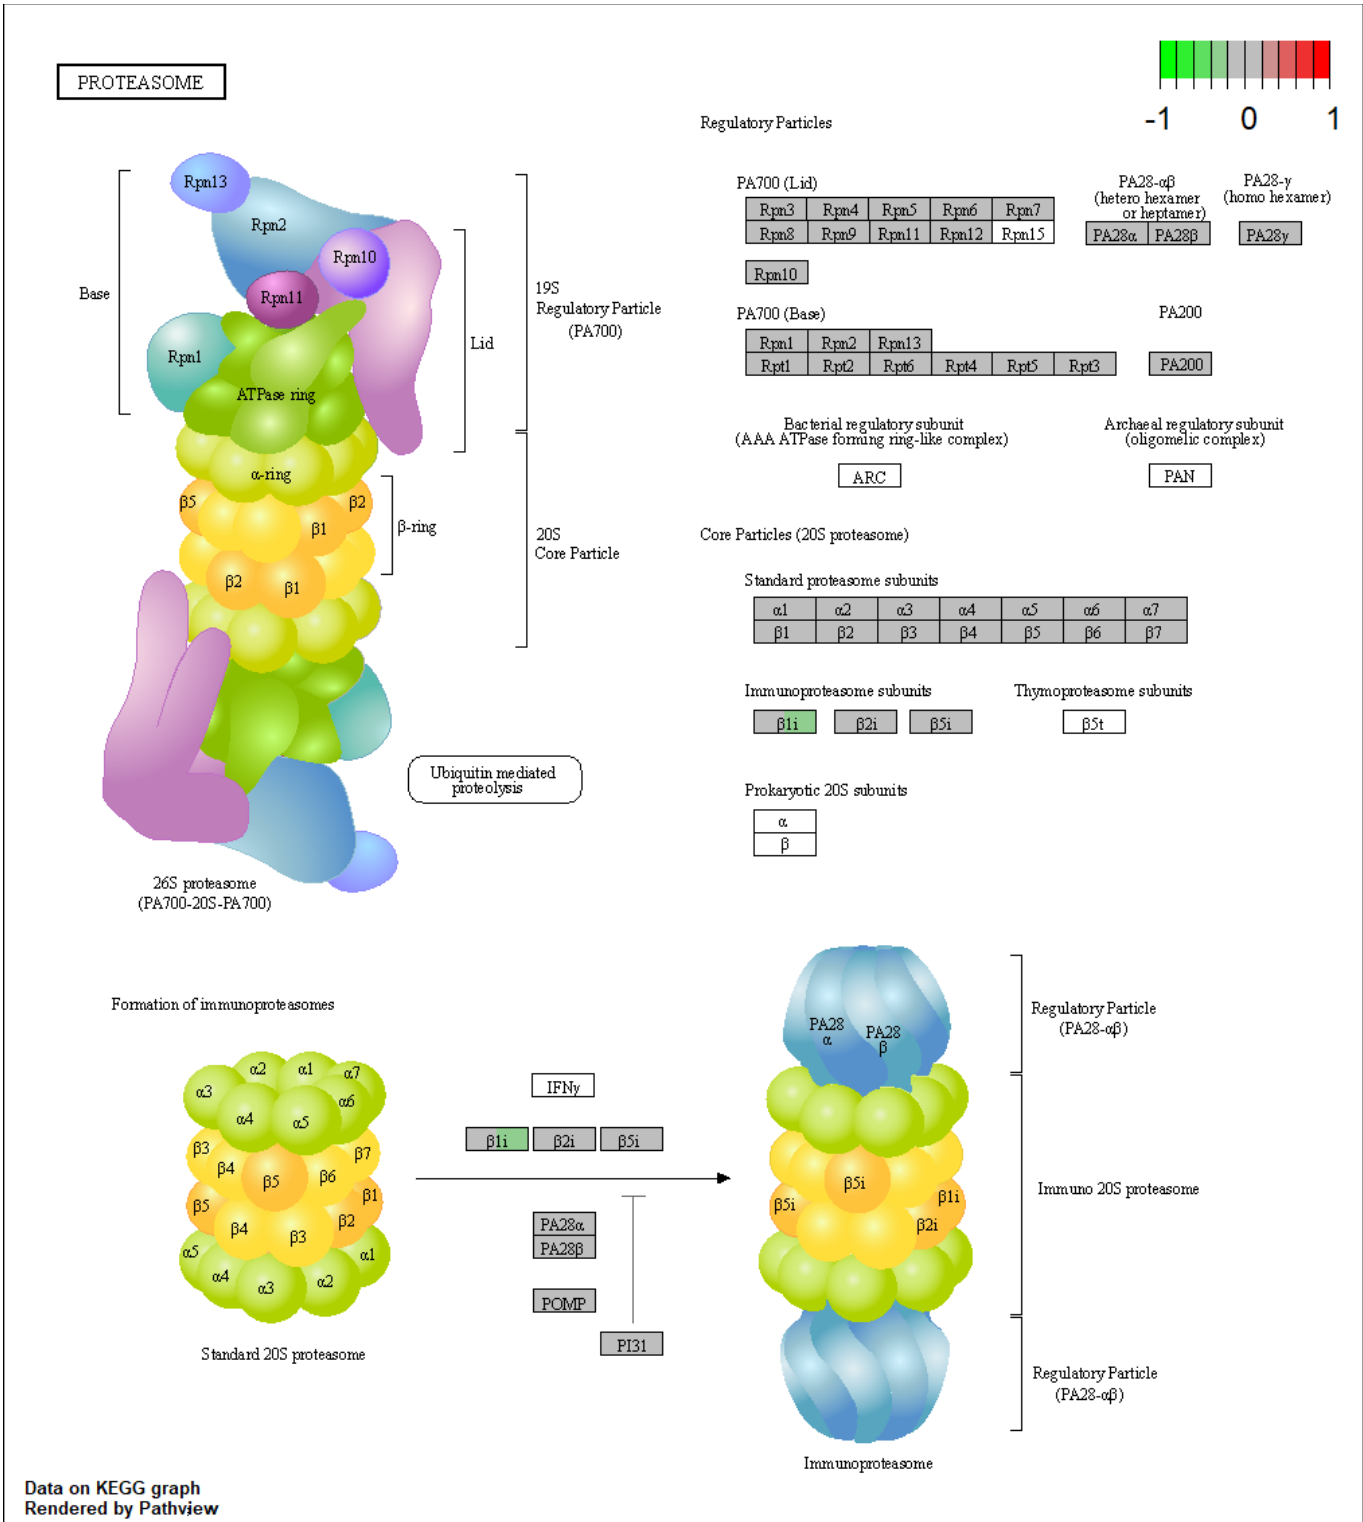

**Figure S27.** NMN treatment effects on the KEGG spliceosome pathway in C2C12 derived myotubes. The colour of the boxes represents the log2 fold change of the protein abundances, represented simultaneously for HN and HH comparisons, H100N versus H0N left side, H100H versus H0H right side, in the corresponding box for each protein. Red: up-regulated; green: down-regulated; grey: no significant expression change.

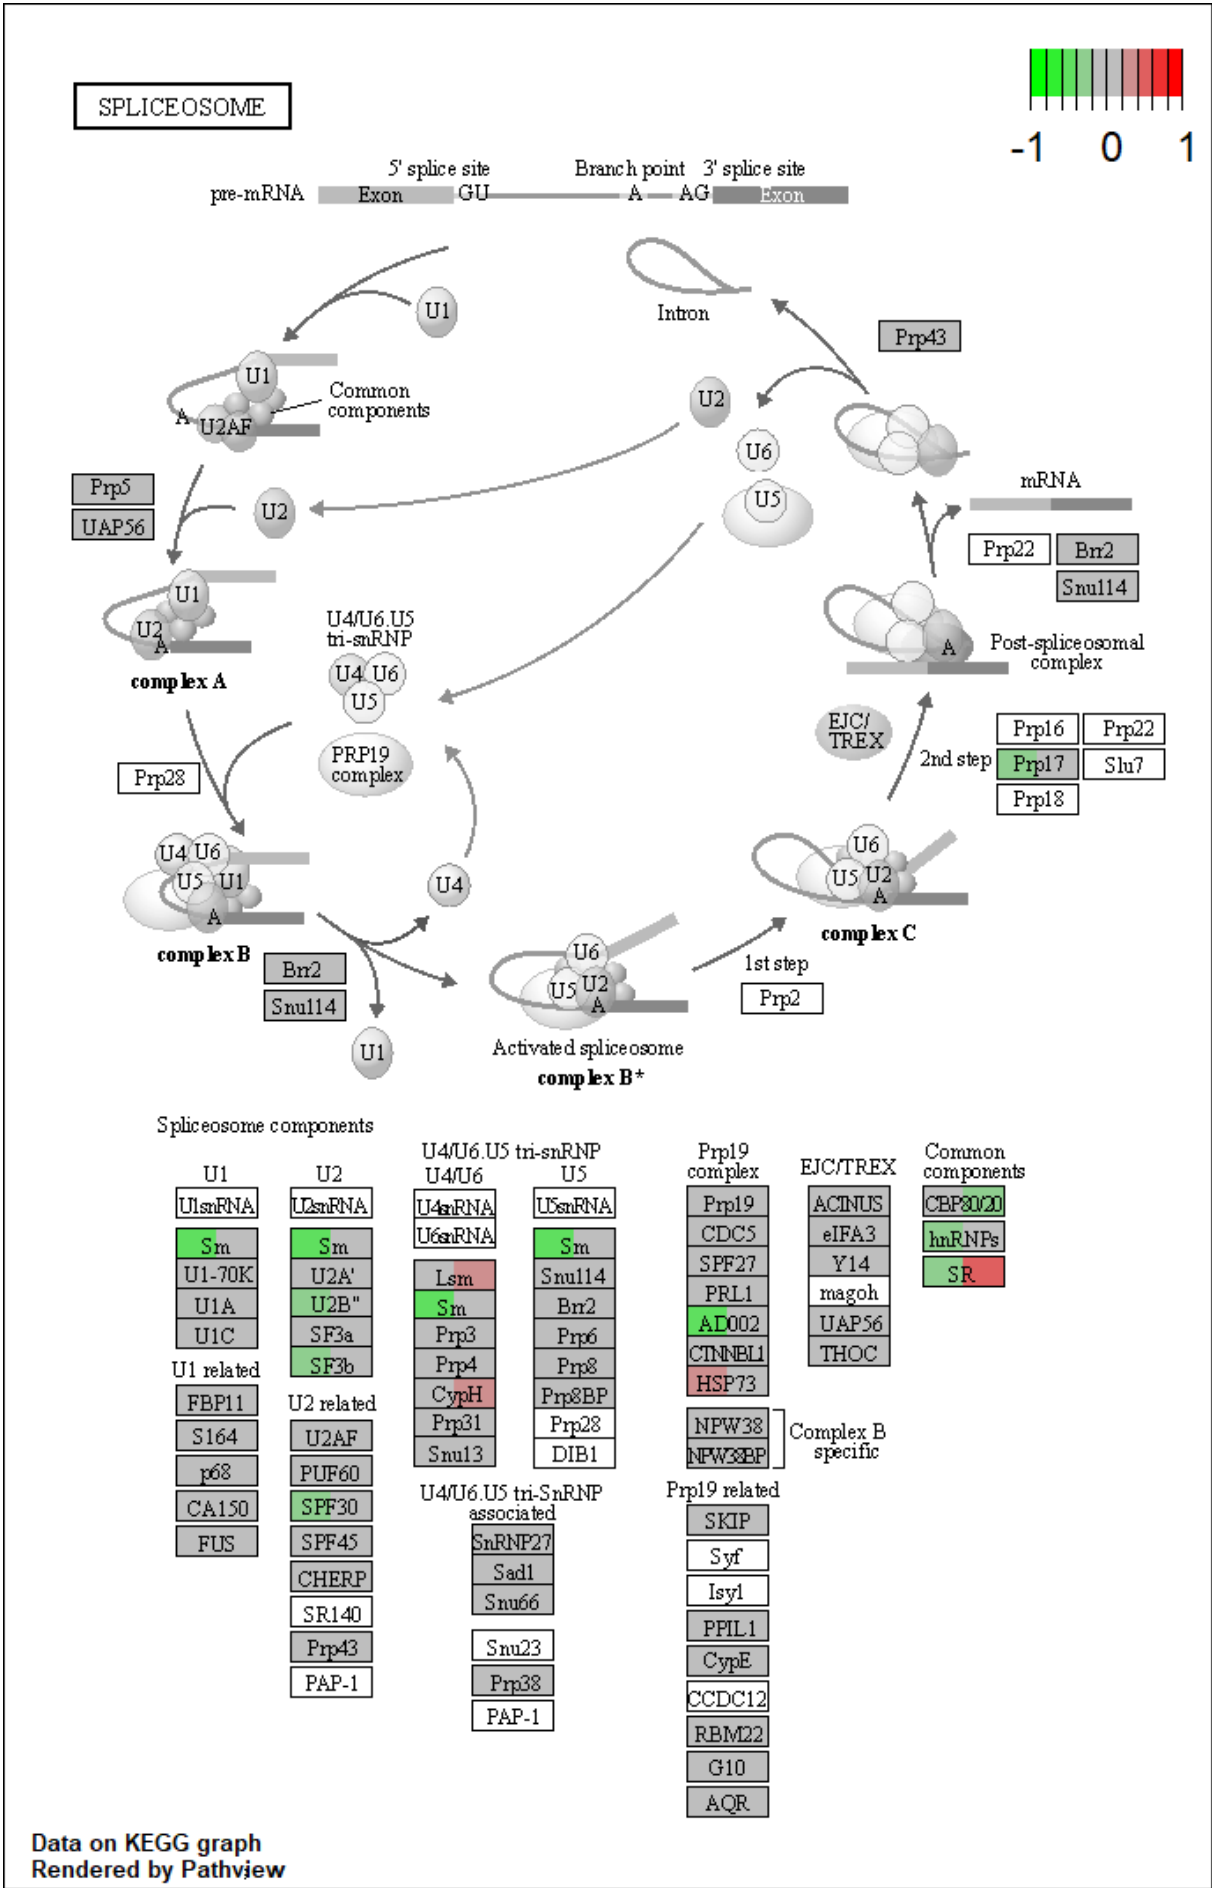

Supplement: s1 [file s1]
